# Supplementary material
Source: publisher figshare collection journal article supplement (https://aacr.figshare.com/articles/dataset/_/22787593)
Supplement: Supplementary file 1 [file 40496224]

**Table S1. Representativeness of Study Participants.**

|                                          |                                                                                                                                                                                                                                                                                                                                                                                                   |
|------------------------------------------|---------------------------------------------------------------------------------------------------------------------------------------------------------------------------------------------------------------------------------------------------------------------------------------------------------------------------------------------------------------------------------------------------|
| Cancer type                              | Urothelial carcinoma (bladder cancer, ureter cancer and renal pelvis cancer)                                                                                                                                                                                                                                                                                                                      |
| Considerations related to:               |                                                                                                                                                                                                                                                                                                                                                                                                   |
| Sex                                      | Urothelial bladder cancer account for 90%-95% urothelial carcinoma. Tumors of bladder and the upper urinary tract (ureteral and pelvic cancers) are almost four times and twice more common in men than in women, respectively.                                                                                                                                                                   |
| Age                                      | The median age at diagnosis of bladder cancer is 69 years for men and 71 years for women. The mean age at diagnosis of the upper urinary tract cancer is 73 years.                                                                                                                                                                                                                                |
| Race/ethnicity                           | In China, the incidence rate of urothelial carcinoma is about 5.5~5.8 cases per 100,000.                                                                                                                                                                                                                                                                                                          |
| Geography                                | Bladder cancer is the 10th most common tumor worldwide, with approximately 573,000 new cases and 213,000 deaths each year. In 2018, 82,270 new bladder cancer cases were diagnosed in China.                                                                                                                                                                                                      |
| Overall representativeness of this study | <p>The age and sex distribution of our study is similar to the average age distribution of urothelial carcinoma in the literature, median age of 68, male to female ratio close to 4:1.</p> <p>This study included all three types of urothelial carcinoma, which may more effectively demonstrate the ability of <sup>68</sup>Ga-N188 PET for nectin-4 quantification and patient selection.</p> |
